# Supplementary material
Source: Springer Nature journal article supplement (https://www.springermedizin.de/resource/supplementary/12960_2012_326_MOESM2_ESM.pdf/9569956)
Supplement: MOESM2 [file 9569956]

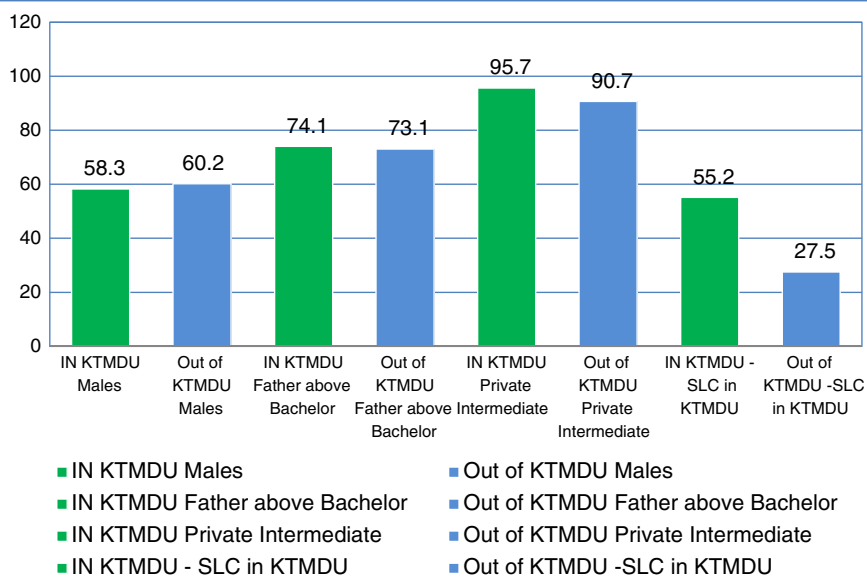

| Demographic Data                        | In Kathmandu College     | Out of Kathmandu College | p values (Chi square) using 0.05 as cutoff |
|-----------------------------------------|--------------------------|--------------------------|--------------------------------------------|
| Gender-Males                            | 310/532 ( <b>58.3%</b> ) | 357/593 ( <b>60.2%</b> ) | p = 0.54                                   |
| Father's Education – Bachelor and above | 367/495 ( <b>74.1%</b> ) | 411/562 ( <b>73.1%</b> ) | p = 0.73                                   |
| Private intermediate                    | 508/531 ( <b>95.7%</b> ) | 537/592 ( <b>90.7%</b> ) | p = 0.001                                  |
| SLC in Kathmandu                        | 290/525 ( <b>55.2%</b> ) | 161/586 ( <b>27.5%</b> ) | P < 0.001                                  |
